# Supplementary material for: Profiling of insulin-resistant kidney models and human biopsies reveals common and cell-type-specific mechanisms underpinning Diabetic Kidney Disease
Source: PubMed Central journal article supplement (PMC11576882; doi:10.1038/s41467-024-54089-1), 2024-11-19

## Supplementary Figures for

### **Profiling of insulin-resistant kidney models and human biopsies reveals common and cell-type-specific mechanisms underpinning Diabetic Kidney Disease**

Abigail C Lay, Van Du T Tran, Viji Nair, Virginie Betin, Jennifer A Hurcombe, Alexandra F Barrington, Robert JP Pope, Frédéric Burdet, Florence Mehl, Dmytro Kryvokhyzha, Abrar Ahmad, Matthew C Sinton, Philip Lewis, Marieangela C Wilson, Rajasree Menon, Edgar Otto, Kate J Heesom, Mark Ibberson, Helen C Looker, Robert G Nelson, Wenjun Ju, Matthias Kretzler, Simon C Satchell, Maria F Gomez, Richard JM Coward, BEAt-DKD consortium

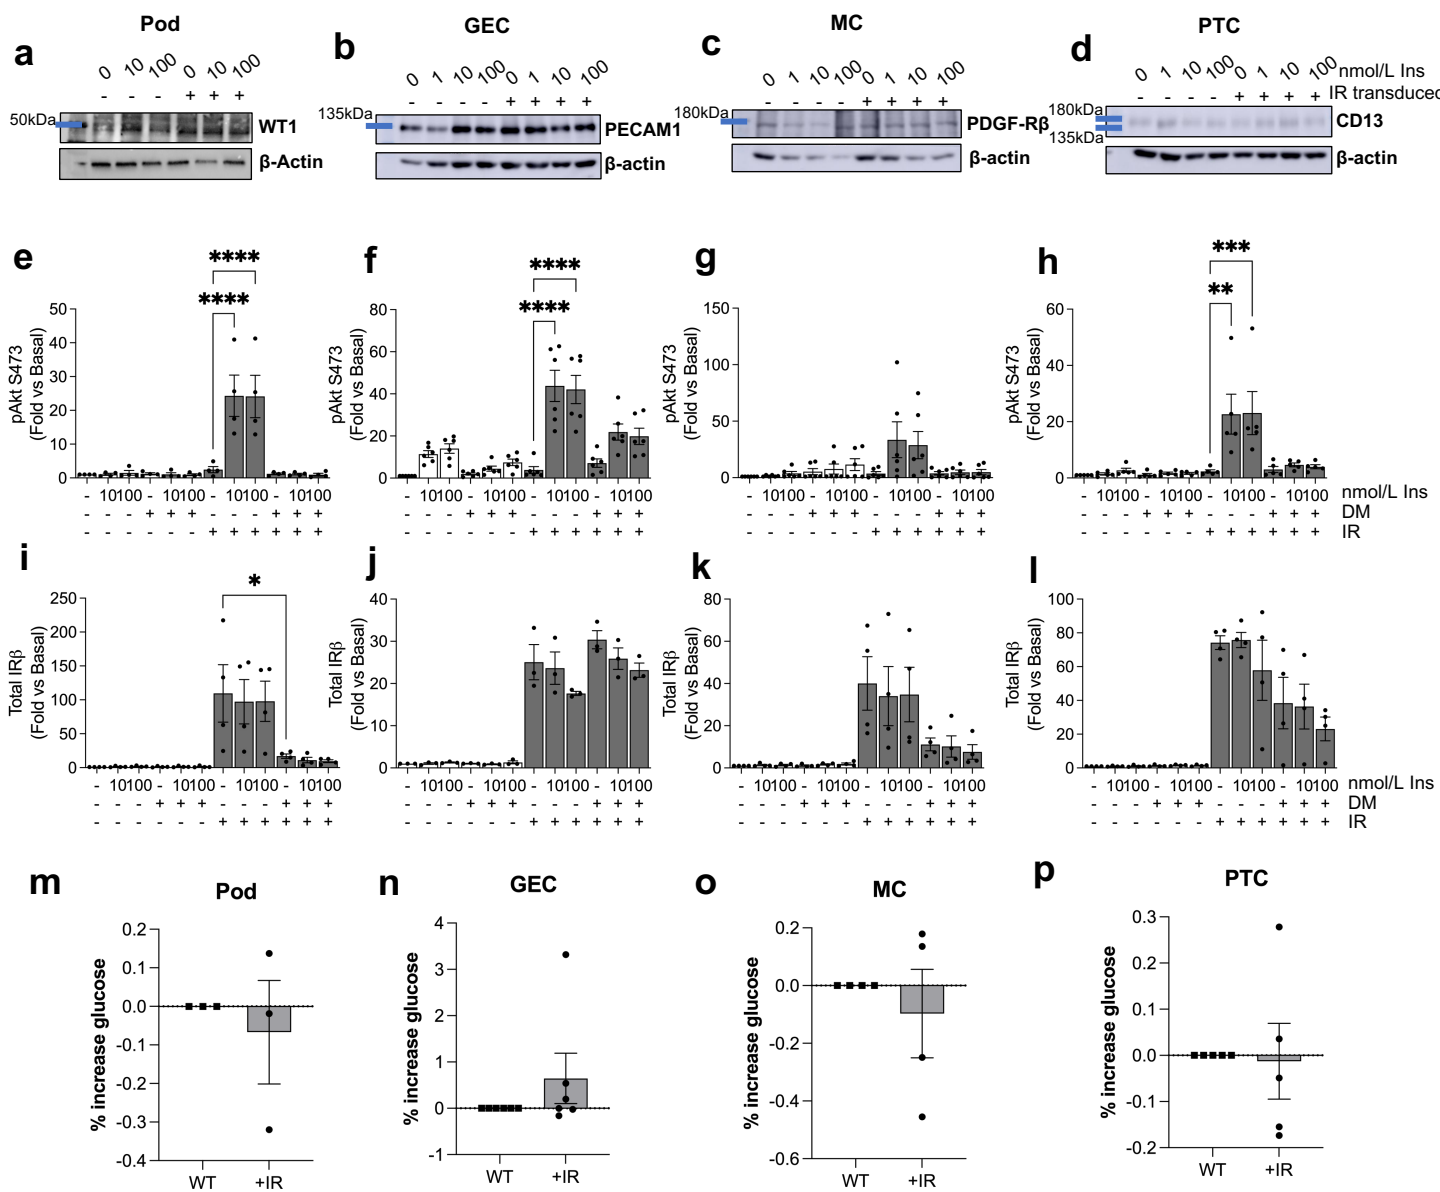

## Supplementary Fig. 1: Overview of cell models

Conditionally immortalised human **a** podocytes (Pods), **b** glomerular endothelial cells (GECs), **c** mesangial cells (MCs) and **d** proximal tubular cells (PTCs) were studied *in vitro* in a basal and insulin resistant environment (consisting of 1ng/ml TNF $\alpha$ , 1ng/ml IL-6, 25mM glucose and 100nmol/L insulin, 'DM'). Insulin-sensitive cell lines were established via stable overexpression of the human insulin receptor (IR). Where indicated, cells were further stimulated with insulin for 15 minutes at 10 or 100nmol/L. **a-d** Western blotting to show expression of marker proteins. Densitometry values for Akt phosphorylation (S473) in **e** Pods ( $n=4$ ), **f** GECs ( $n=6$ ), **g** MCs ( $n=6$ ) and **h** PTCs ( $n=5$ ) and Total IR $\beta$  in **i** Pods ( $n=4$ ), **j** GECs ( $n=4$ ), **k** MCs ( $n=4$ ) and **l** PTCs ( $n=4$ ) under the indicated conditions, \* $p < 0.05$ , \*\* $p < 0.01$ , \*\*\* $p < 0.001$ , \*\*\*\* $p < 0.0001$ , one-way ANOVA with Tukey's multiple comparison test. Percentage change in cellular uptake of [ $^3\text{H}$ ]2-deoxy-D-glucose in IR-transduced ('+IR') vs wild-type ('WT') **m** Pods ( $n=3$ ), **n** GECs ( $n=6$ ), **o** MCs ( $n=4$ ) and **p** PTCs ( $n=5$ ), ns, two-tailed *t*-test.

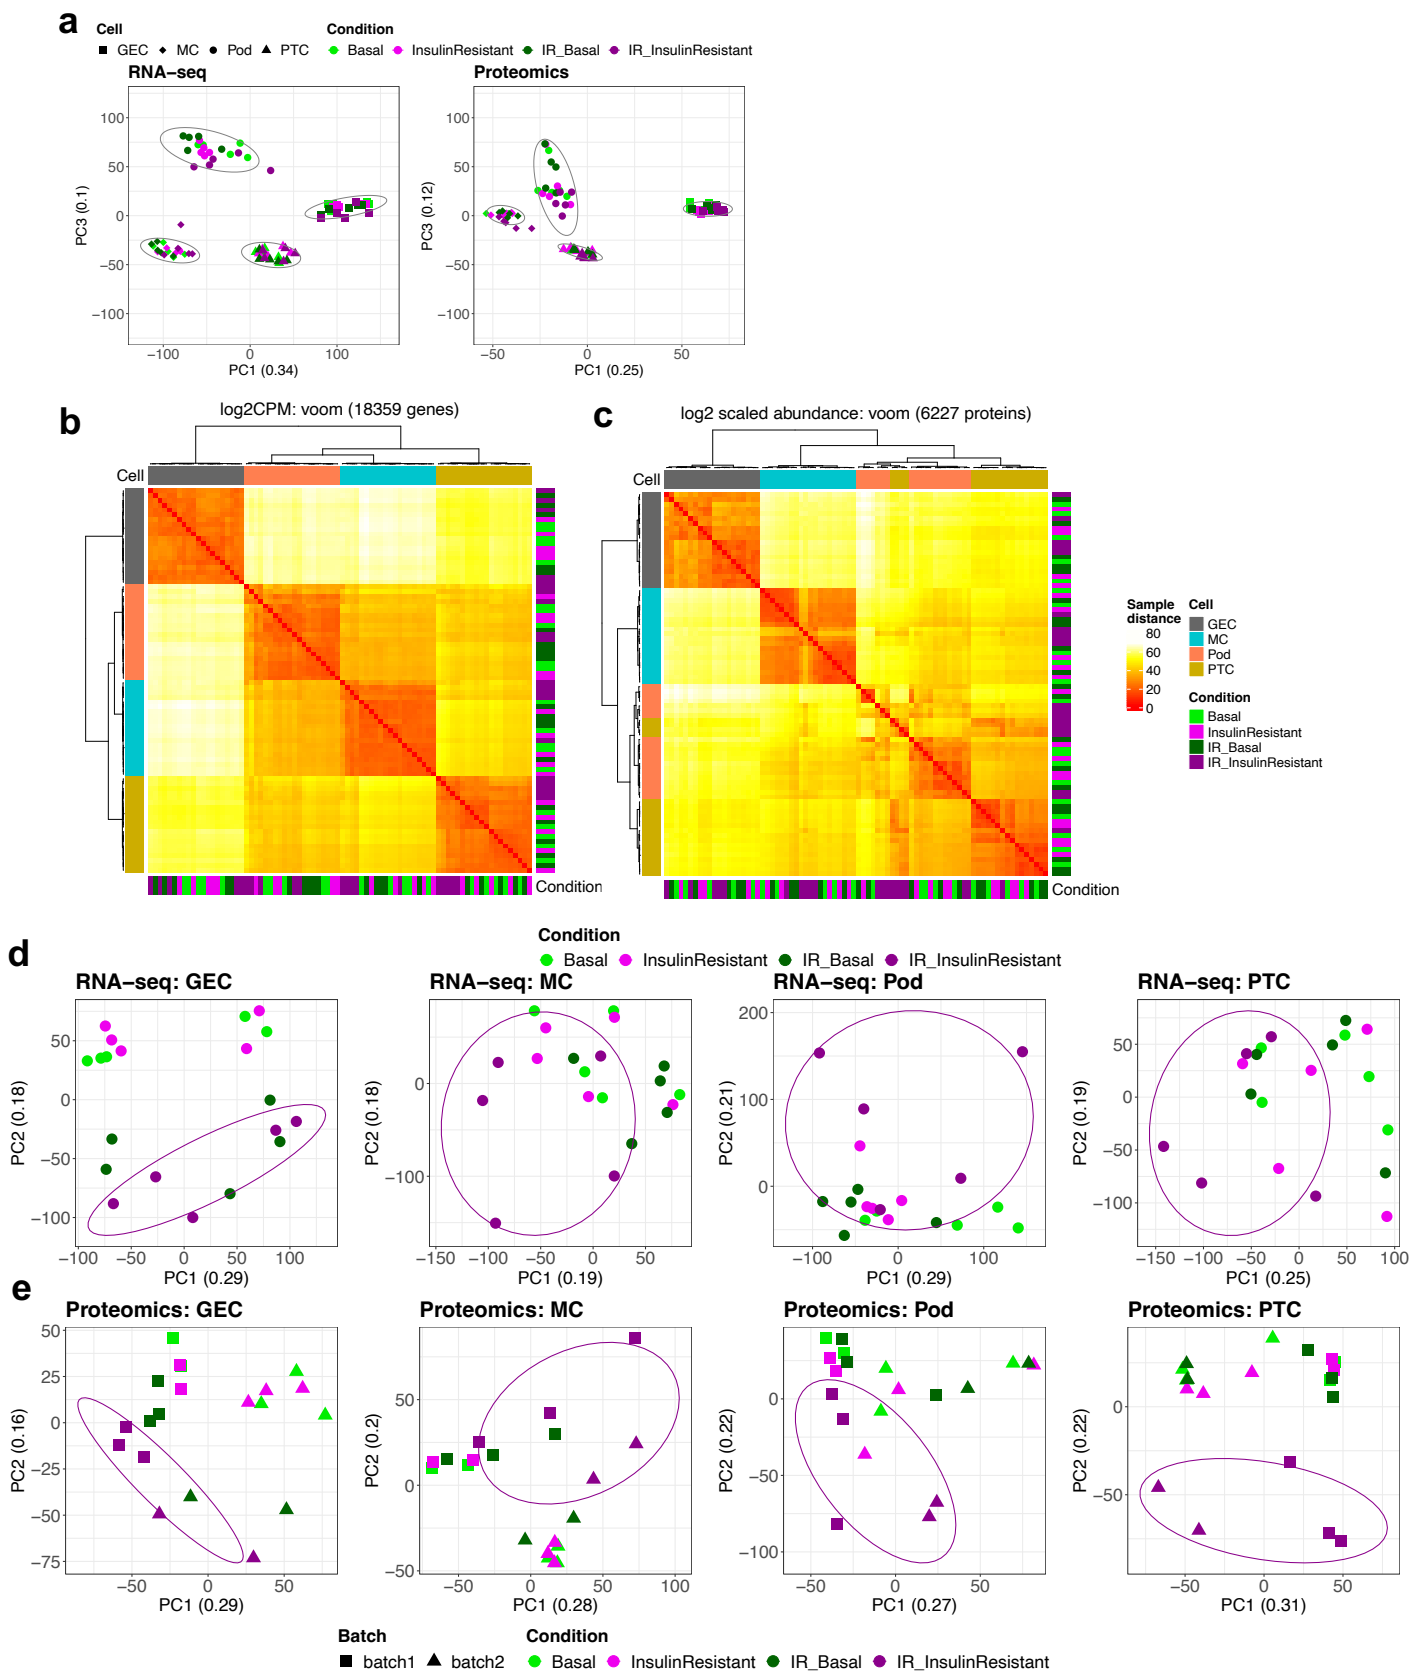

**Supplementary Fig. 2: Overview of transcriptomics and proteomics data from insulin-sensitive and insulin-resistant human cell lines**

RNA and protein were simultaneously isolated from podocytes (Pods), Glomerular Endothelial Cells (GECs), Mesangial Cells (MCs) and Proximal Tubular Cells (PTCs) under basal and insulin-resistant conditions, with and without additional IR-transfection ( $n=5$ /condition). **a** Principal component analysis (PCA) of >18 000 transcripts identified by RNAseq and >6 000 proteins, detected across all cell lines and conditions studied, demonstrating the primary clustering of samples by cell type. Sample-to-sample Euclidian distance heatmaps for **b** transcriptomics and **c** proteomics data. PCA of **d** transcriptomic and **e** proteomics data, performed on individual cell types, demonstrates separation of highly insulin-resistant samples.

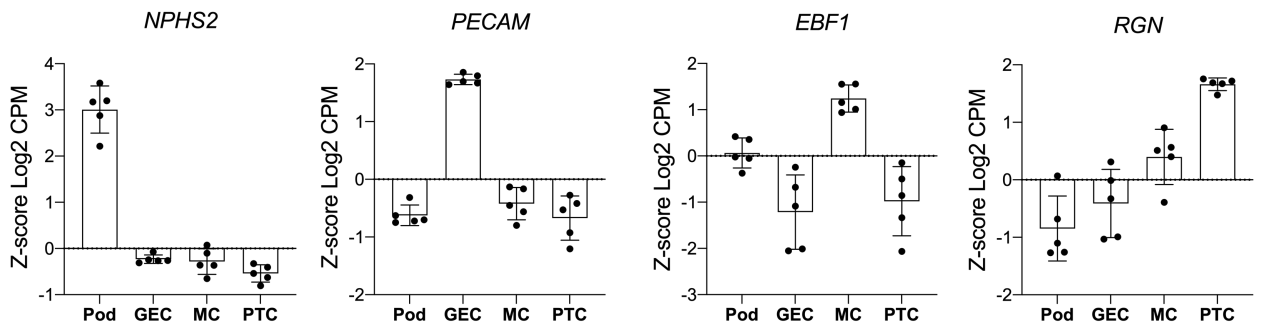

**Supplementary Fig. 3: Examples of cell-type-specific genes detected in transcriptomics data from human cell lines**

Expression of *NPHS2*, *PECAM*, *EBF1* and *RGN* in conditionally-immortalised human Podocytes (Pods), Glomerular endothelial cells (GECs), Mesangial Cells (MCs), and proximal tubular cells (PTs).



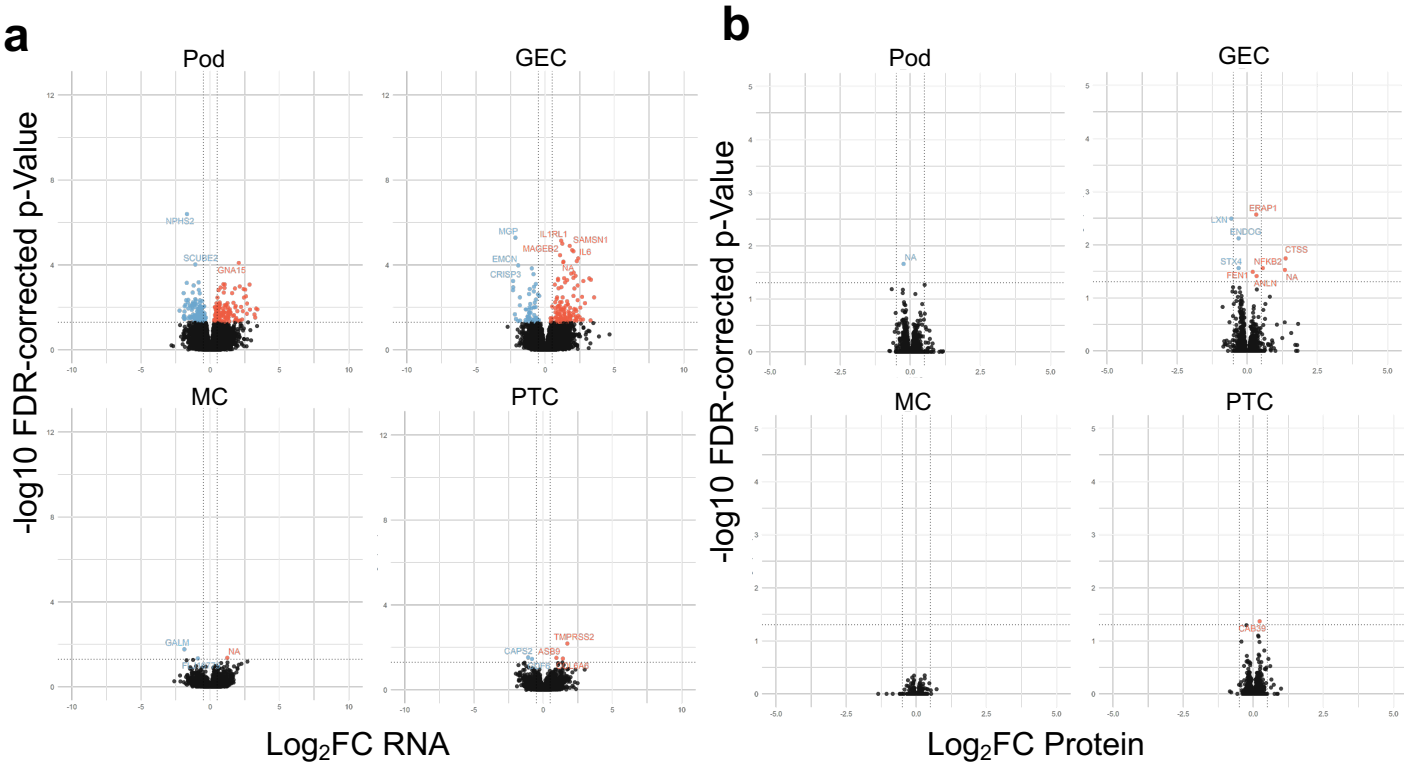

**Supplementary Fig. 4: Transcriptome and proteome changes in non-insulin receptor transfected basal v insulin-resistant kidney cell lines**

**a** Transcripts and **b** Proteins differentially expressed podocyte (Pod), glomerular endothelial cell (GEC), Mesangial cell (MC) and Proximal tubular Cell (PTC) lines in diabetic (insulin-resistant) environment vs basal conditions, with examples of significantly regulated molecules highlighted (FDR<0.05).

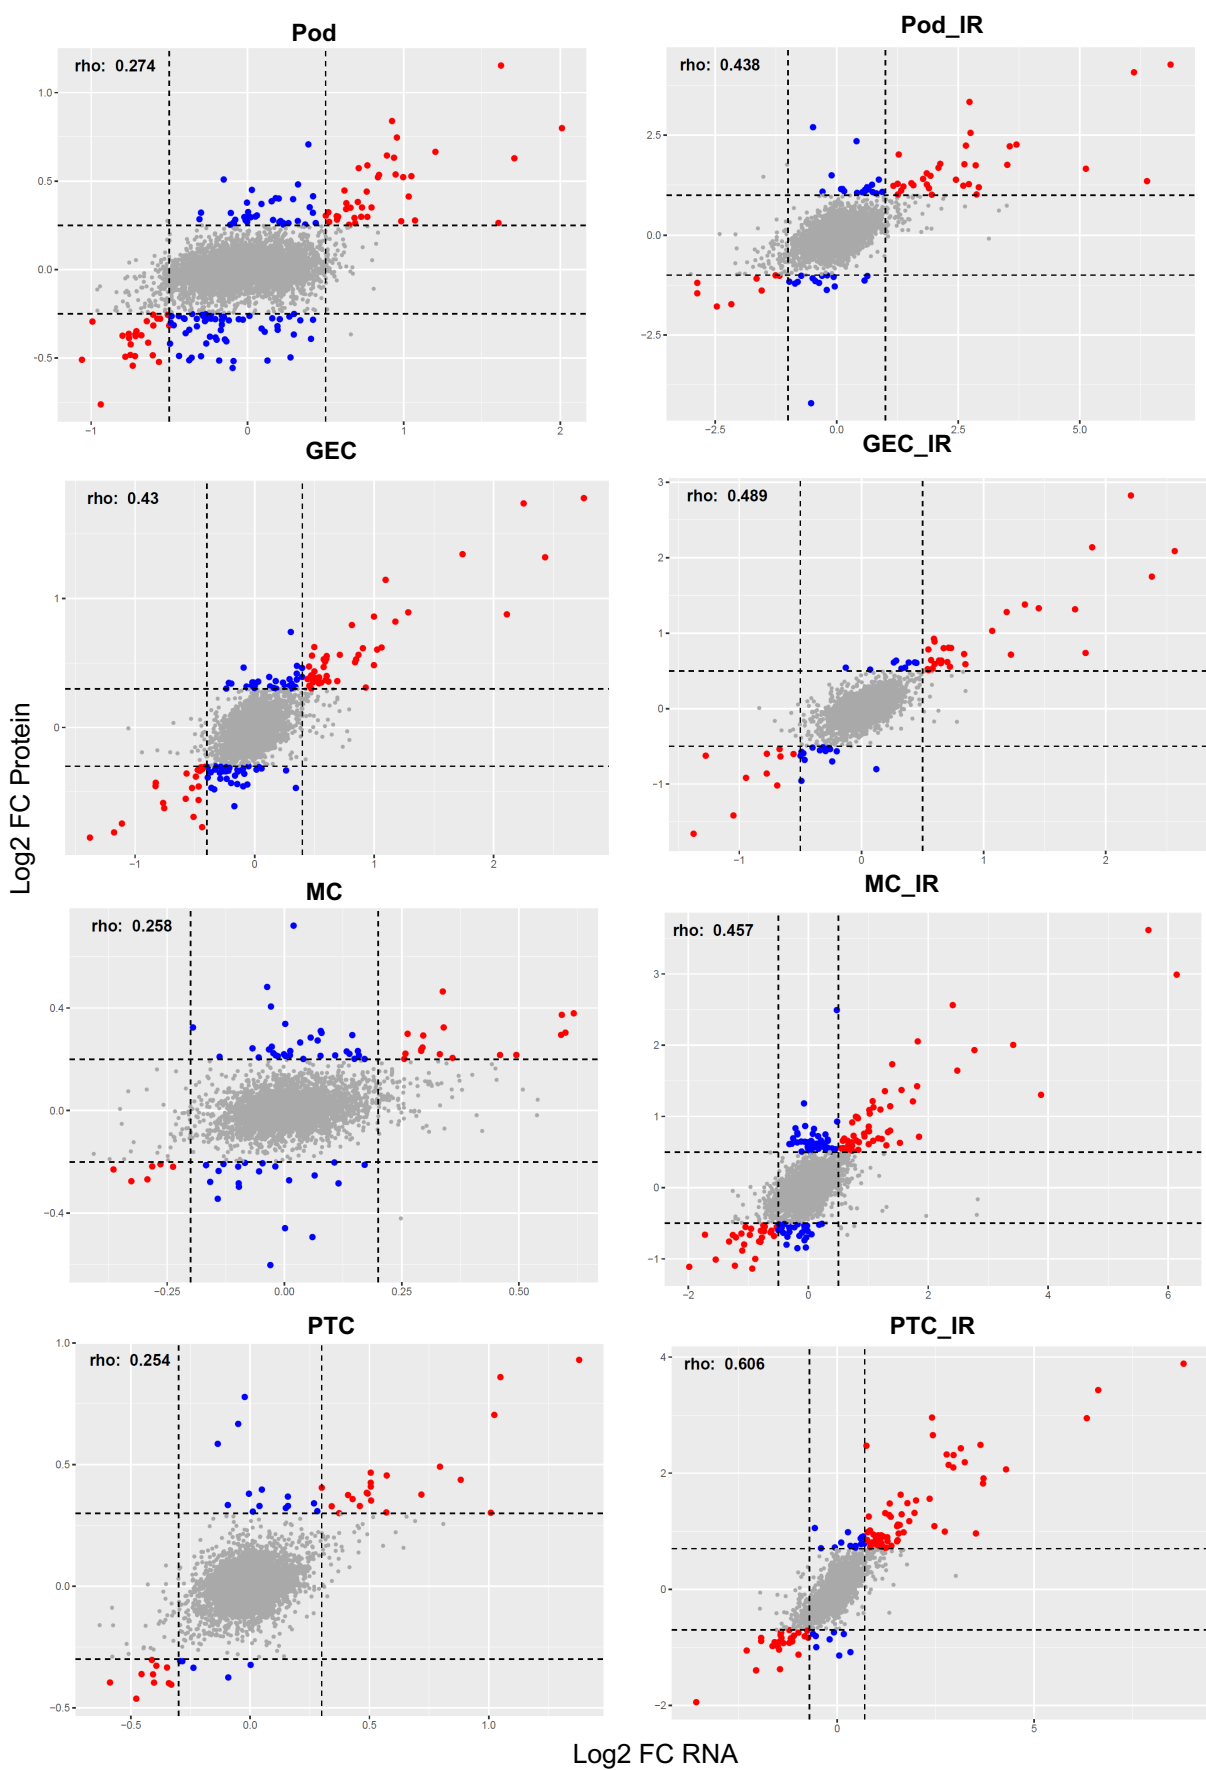

**Supplementary Fig. 5: Comparison between regulation at the transcript and protein level within in insulin-resistant vs insulin-sensitive cell lines**  
 Correlation plots demonstrating regulation at transcript- and protein- level indicating stronger correlation between regulation at the transcript and protein level in response to a diabetic environment in our highly-insulin sensitive cell model (i.e., IR-transfected cell lines)

| Cell type | R <sup>2</sup> X | R <sup>2</sup> Y | Q <sup>2</sup> | t-test (n=1000)                      |
|-----------|------------------|------------------|----------------|--------------------------------------|
| Pod       | 0.394            | 0.971            | 0.753          | p < 0.001, mean = -0.111, SD = 0.411 |
| GEC       | 0.368            | 0.958            | 0.416          | p < 0.001, mean = -0.196, SD = 0.612 |
| MC        | 0.398            | 0.977            | 0.621          | p < 0.001, mean = -0.117, SD = 0.426 |
| PTC       | 0.496            | 0.982            | 0.841          | p < 0.001, mean = -0.195, SD = 0.580 |

### Supplementary Fig. 6: Overview of Consensus Orthogonal Partial Least Squares Discriminant Analysis (OPLS-DA) model

Consensus OPLS modelling was performed on proteomics and RNAseq data tables, which were all autoscaled prior to the analysis, for each cell type independently. The models were computed with 2 latent variables, 1 predictive and 1 orthogonal. The quality of the model was assessed by  $R^2$  and  $Q^2$  values, which define the portion of data variance explained by the model and the predictive ability of the model, respectively. The  $Q^2$  value was computed by a K-fold cross validation (K=7). To ensure the validity of the model, a series of 1,000 permutation tests were carried out by mixing randomly the original Y response (basal vs insulin resistant). A t-test was performed to ensure that the true model  $Q^2$  value was clearly distinguished and statistically different from the random model distribution. The variable relevance to discriminate between the two conditions was evaluated using the variable importance in projection (VIP) parameter, which reflects the importance of variables both with respect to the response and to the projection quality.

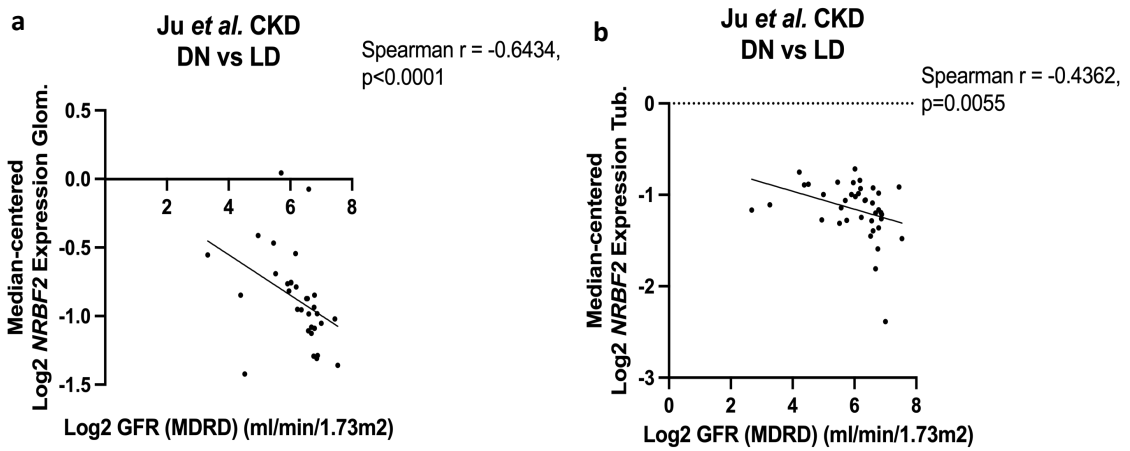

### Supplementary Fig. 7: *NRBF2* expression in human late-stage DKD

Human microarray data (Log<sub>2</sub>) and eGFR from the 'Ju-CKD' dataset within the 'Nephroseq' database demonstrating **a** *NRBF2* expression in glomeruli in DKD and healthy living donor samples  $n=33$  **b** *NRBF2* expression in tubular interstitium in DKD and healthy living donor samples  $n=39$

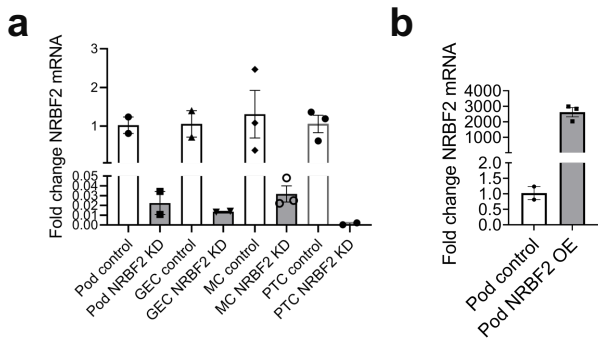

**Supplementary Figure 8: Level NRBF2 knockdown and overexpression in human kidney cell lines**

**a** qPCR data demonstrating expression of *NRBF2* mRNA in conditionally-immortalised human podocytes (Pod), Glomerular Endothelial Cells (GEC), Mesangial Cells (MC) and Proximal Tubular Cells (PTC) transduced with shRNA targeting *NRBF2* or scrambled-RNA 'Control'.

**b** qPCR data confirming increased *NRBF2* mRNA in podocytes transduced with human *NRBF2*-containing lentivirus (i.e., 'overexpressing' [OE] cell system).

Selected GO Biological Process enriched (p < 0.05, q < 0.1) in at least one cell type  
\*p < 0.05, \*\*p < 0.01

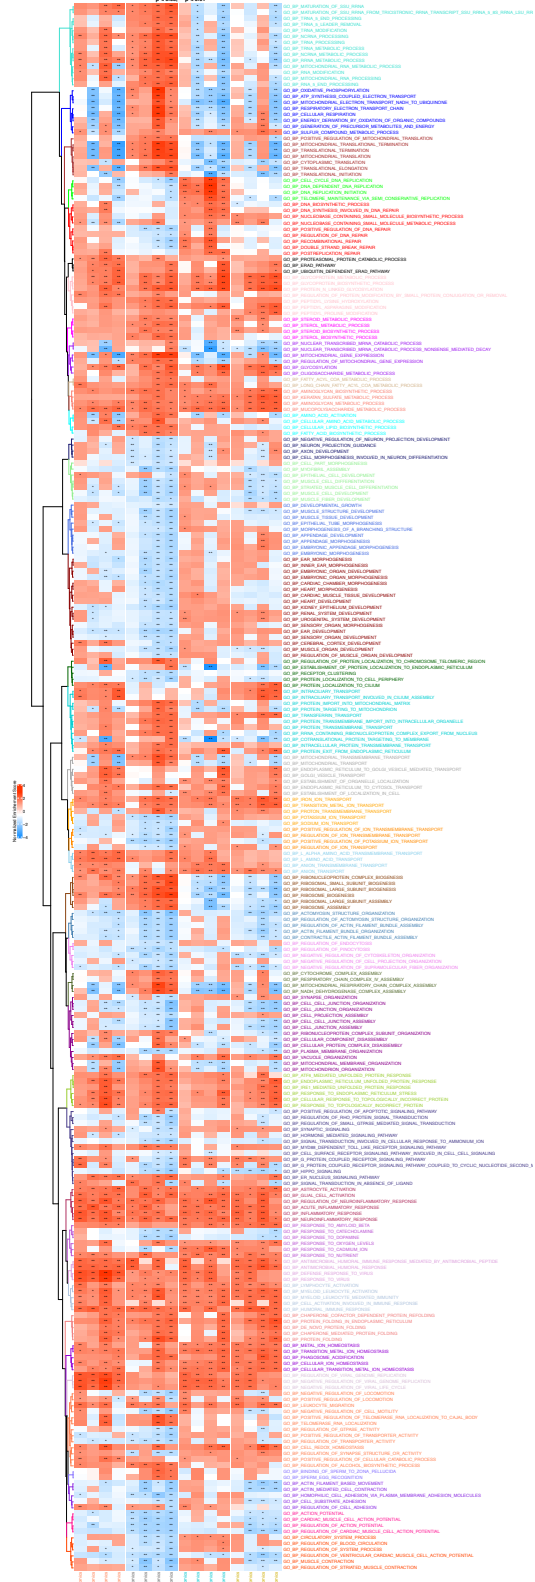

### **Supplementary Fig. 9: GSEA results using GOBP**

Gene set enrichment analysis was performed using results of differential expression ('DE') and Consensus-Orthogonal Partial Least Squares Discriminant ('OPLS') analysis, 'insulin resistant' vs 'basal' cells. Enriched GO terms were filtered for significance in at least one cell type (nominal  $p$ -value $<0.05$  and  $q$ -value $<0.1$  from both omics data either from individual DE or Consensus OPLS). Terms were then hierarchically clustered with the semantic similarity between GO terms based on the graph structure of GO (Wang measure) using the R package GOSemSim (v2.12.1) and then displayed as a heatmap of normalised enrichment scores (NES), \*  $p<0.05$ , \*\*  $p<0.01$ .

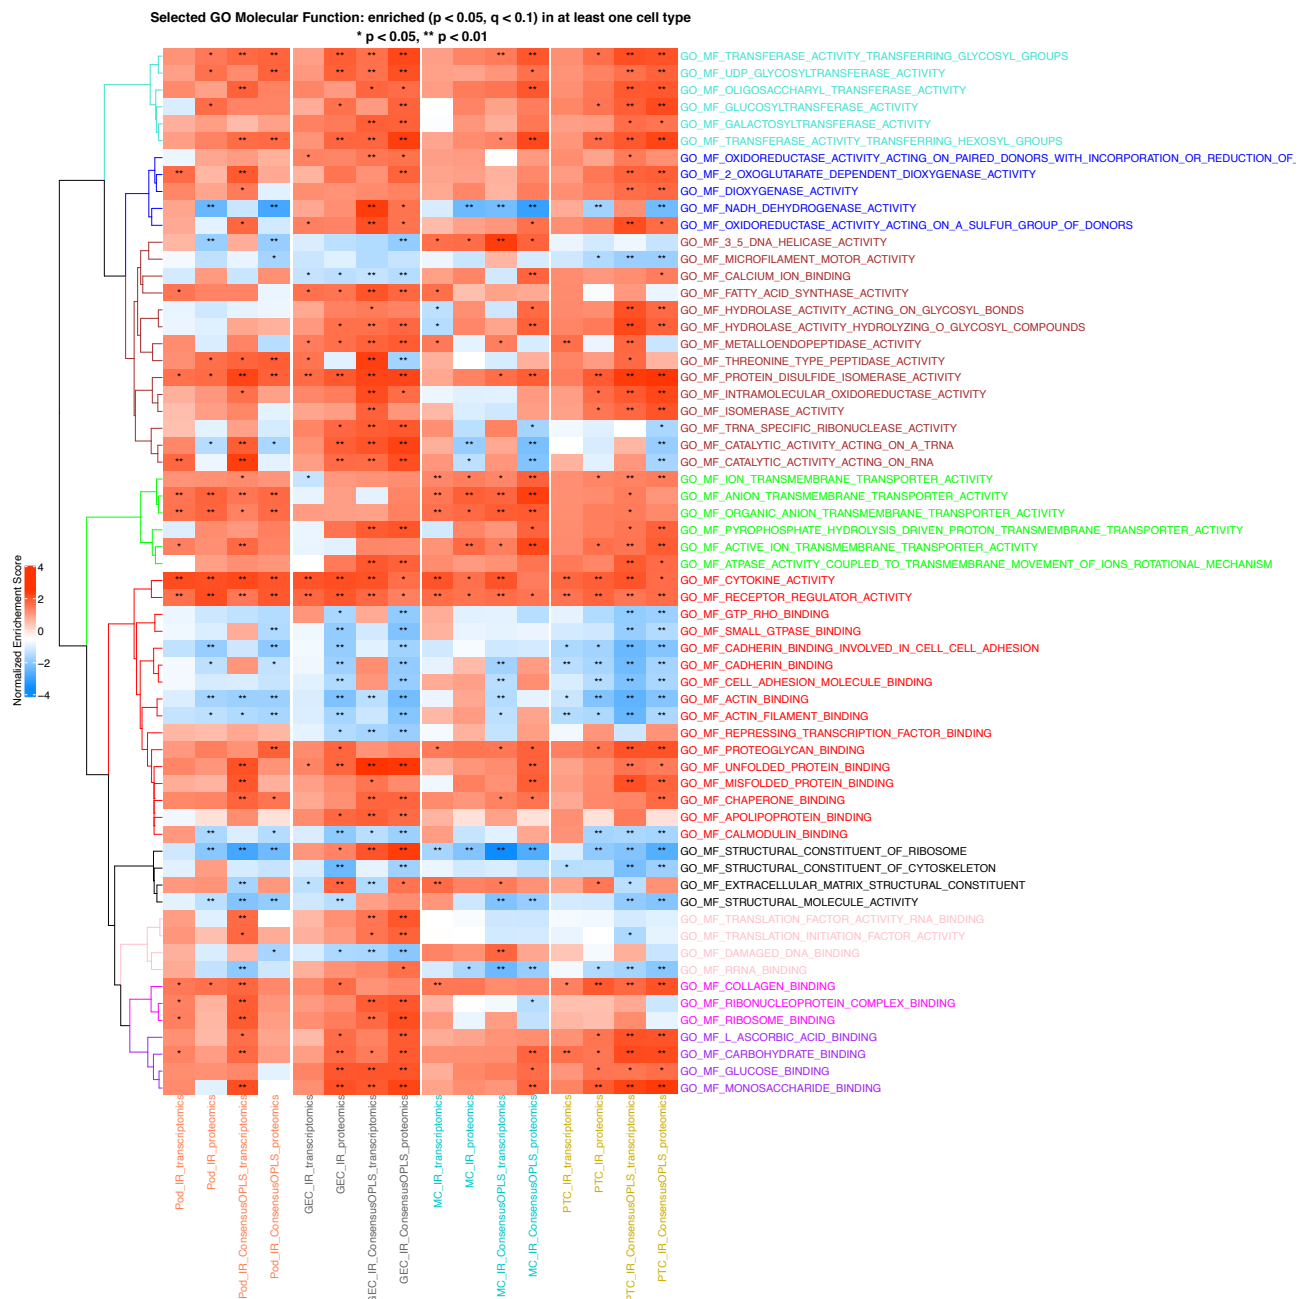

### Supplementary Fig. 10: GSEA results using GOMF

Gene set enrichment analysis was performed using results of differential expression ('DE') and Consensus-Orthogonal Partial Least Squares Discriminant ('OPLS') analysis, 'insulin resistant' vs 'basal' cells. Enriched GO terms were filtered for significance in at least one cell type (nominal  $p$ -value  $< 0.05$  and  $q$ -value  $< 0.1$  from both omics data either from individual DE or Consensus OPLS). Terms were then hierarchically clustered with the semantic similarity between GO terms based on the graph structure of GO (Wang measure) using the R package GOSemSim (v2.12.1) and then displayed as a heatmap of normalised enrichment scores (NES),  $* p < 0.05$ ,  $** p < 0.01$ .



Selected GO Cellular Component: enriched (p < 0.05, q < 0.1) in at least one cell type

\* p < 0.05, \*\* p < 0.01

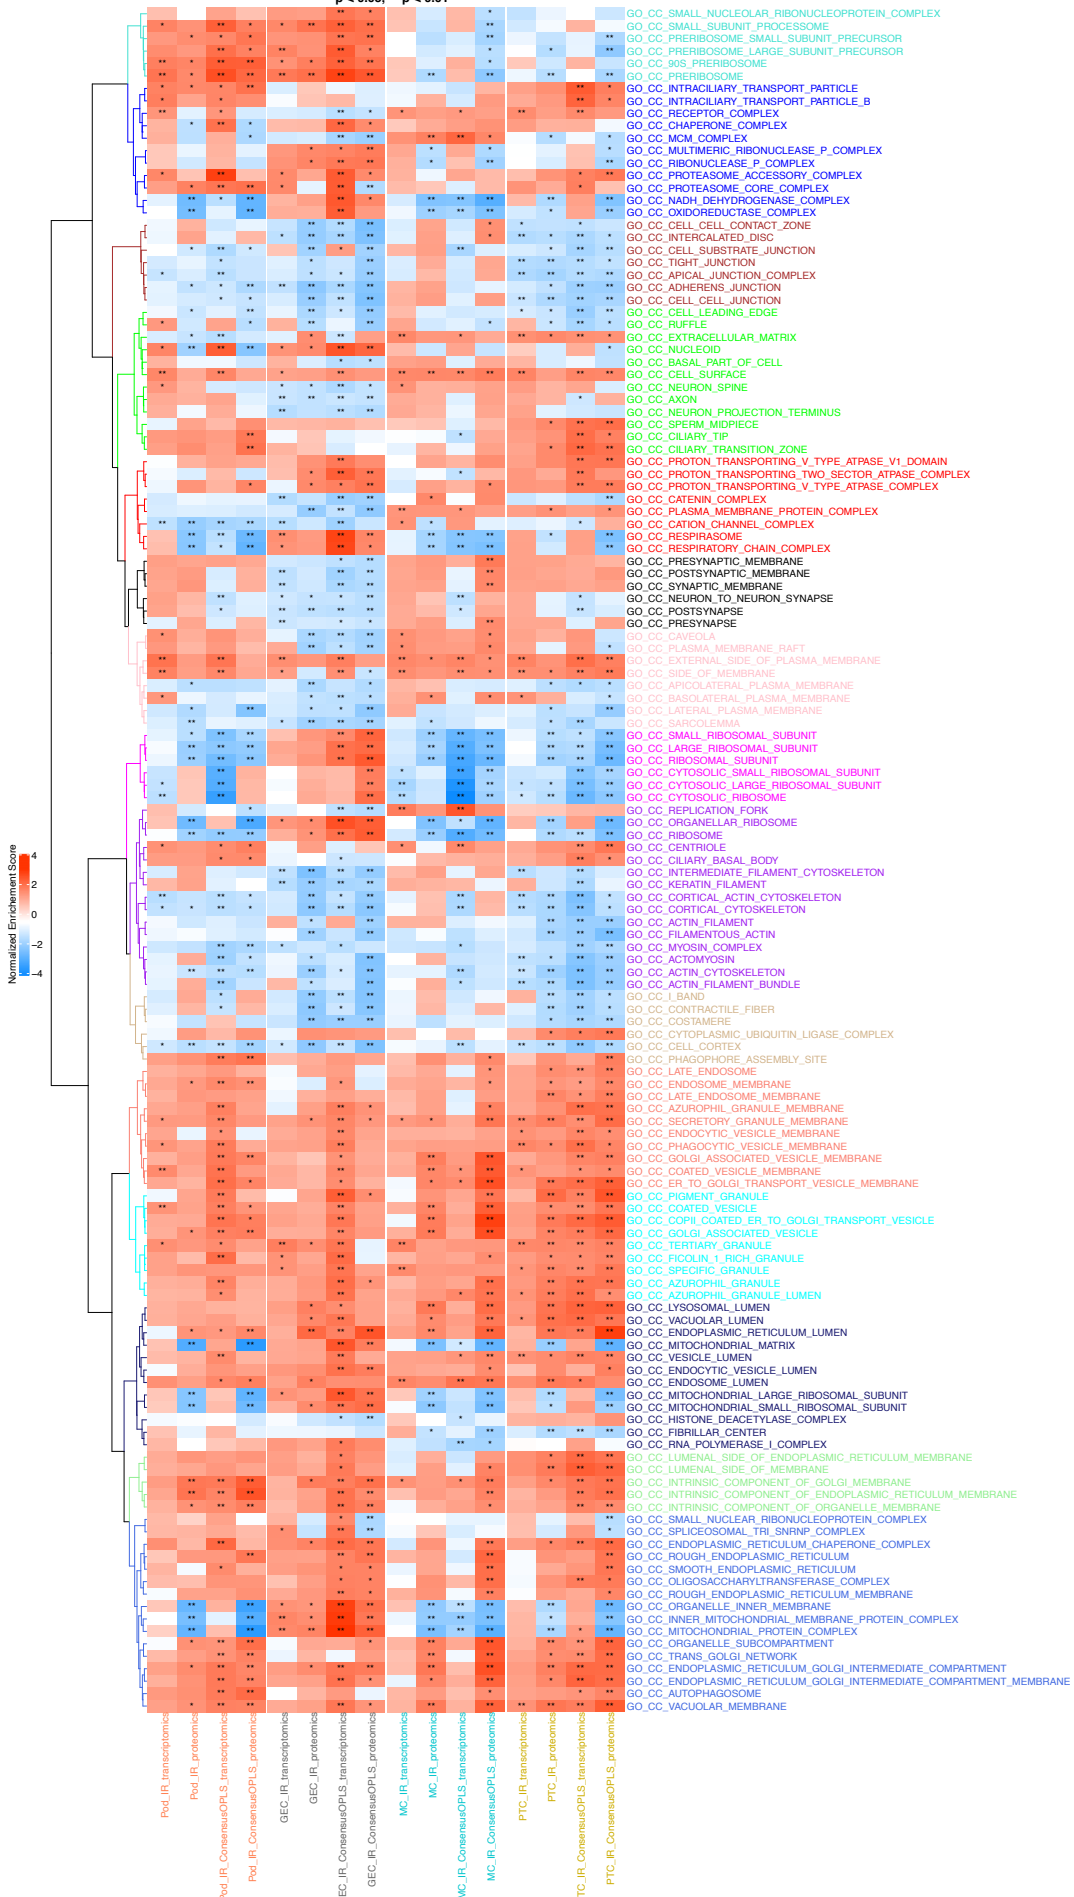

### **Supplementary Fig. 11: GSEA results using GOCC**

Gene set enrichment analysis was performed using results of differential expression ('DE') and Consensus-Orthogonal Partial Least Squares Discriminant ('OPLS') analysis, 'insulin resistant' vs 'basal' cells. Enriched GO terms were filtered for significance in at least one cell type (nominal p-value<0.05 and q-value<0.1 from both omics data either from individual DE or Consensus OPLS). Terms were then hierarchically clustered with the semantic similarity between GO terms based on the graph structure of GO (Wang measure) using the R package GOSemSim (v2.12.1) and then displayed as a heatmap of normalised enrichment scores (NES), \* p<0.05, \*\* p<0.01.

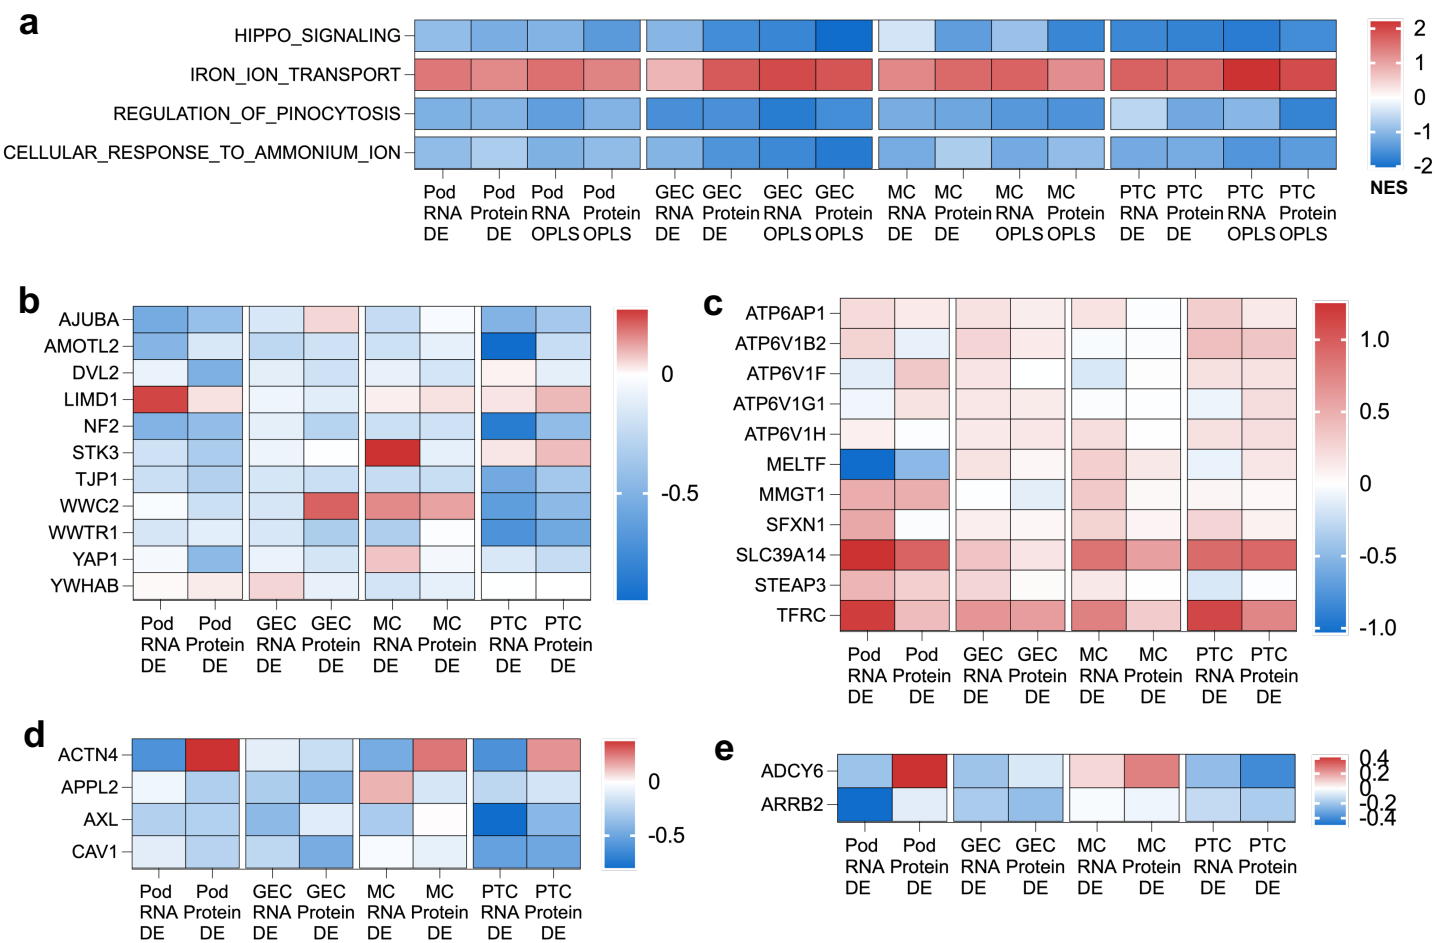

## Supplementary Fig. 12: Consistently regulated GOBP terms in insulin resistant kidney cells

Gene set enrichment analysis was performed using results of differential expression ('DE') and Consensus-Orthogonal Partial Least Squares Discriminant ('OPLS') analysis. Heatmaps displaying **a** normalised enrichment scores ('NES') for GOBP terms commonly regulated in insulin resistant podocytes (Pods), Glomerular Endothelial Cells (GECs), Mesangial Cells (MCs) and Proximal Tubular Cells (PTCs) at both the RNA and protein level and **b-e** CORE enrichment genes for **b** 'HIPPO signalling' **c** 'Iron Ion Transport' **d** 'Regulation of pinocytosis' and **e** 'Cellular response to ammonium ion'

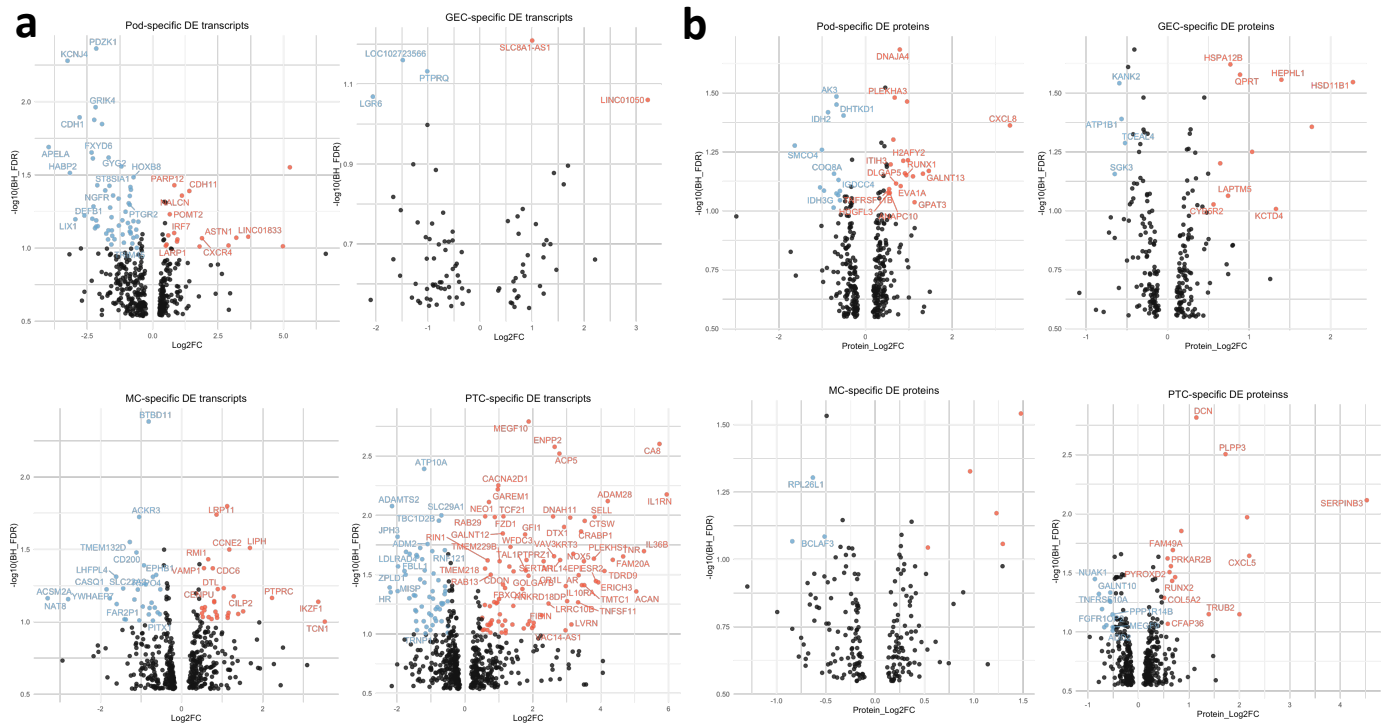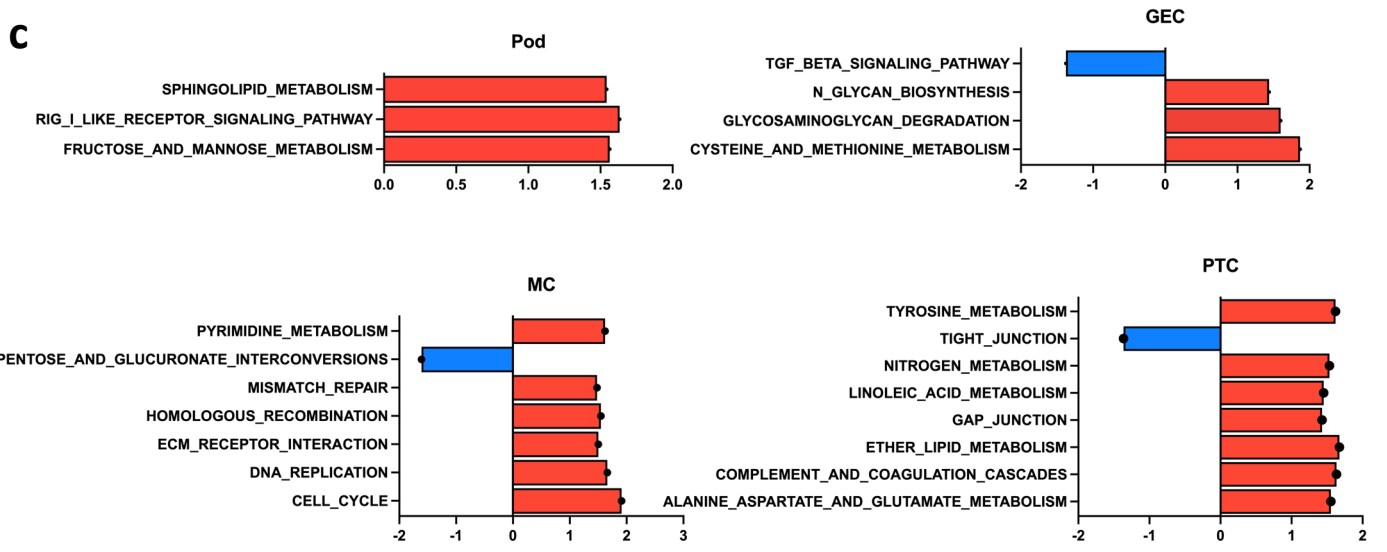

**Supplementary Fig. 13: Individual analysis to reveal transcripts and proteins regulated in cell-line specific patterns**

Transcriptome and proteome data were individually normalised and analysed for each cell line. Cell-line-specific regulation of transcripts and proteins was established using nominal  $p < 0.05$  and further filtering such that, in addition to  $p > 0.05$  in the other cell lines,  $\text{Log}_2\text{FC} < 0.1$  for upregulated and  $> -0.1$  for downregulated transcripts/ proteins. Volcano plots display the **a** transcripts and **b** proteins that were up- or down-regulated in a cell-line specific manner;  $-\log_{10}$  FDR (Benjamini Hochberg) vs  $\text{Log}_2$  fold-change. **c** Gene Set Enrichment Analysis using the KEGG database demonstrating the cell-type-specific enriched pathways in response to insulin resistance in podocytes (Pods), Glomerular Endothelial Cells (GECs), Mesangial Cells (MCs) and Proximal Tubular Cells (PTCs) ( $p < 0.05$ ).

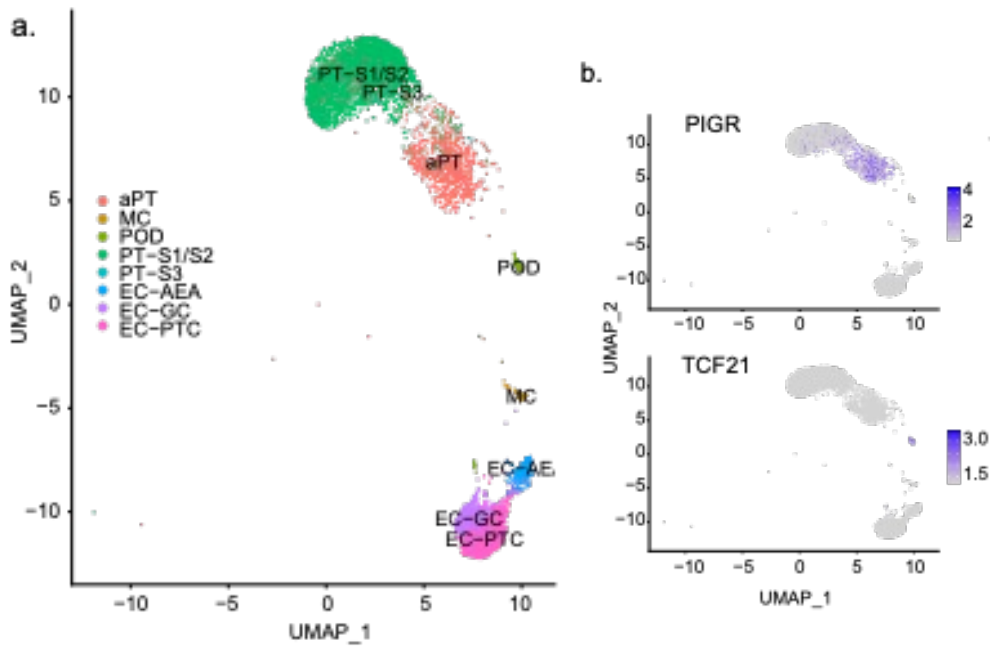

**Supplementary Fig. 14: Targeted analysis of human kidney single-cell sequencing demonstrates cell-type-specific expression of genes of interest.**

**a** Reference UMAP of healthy human kidney single-cell sequencing data from KPMP highlighting specific cell type clusters of interest ('aPT' = Proximal Tubule Cell-adaptive; 'MC' = Mesangial cells; 'POD' = Podocytes; 'PT-S1/S2' = Proximal Tubule Subcluster 1 /2; 'PT-S3' = Proximal Tubule Subcluster 3; 'EC-AEA' = Endothelial Cell-Arteriola; 'EC-GC' = Endothelial Cell-Glomerular Capillary; 'EC-PTC' = Endothelial Cell-Peritubular Capillary), **b** UMAP plots displaying cell specificity of expression (in healthy human kidney) for selected genes found to be regulated at cell-line-specific level in response to insulin resistance.

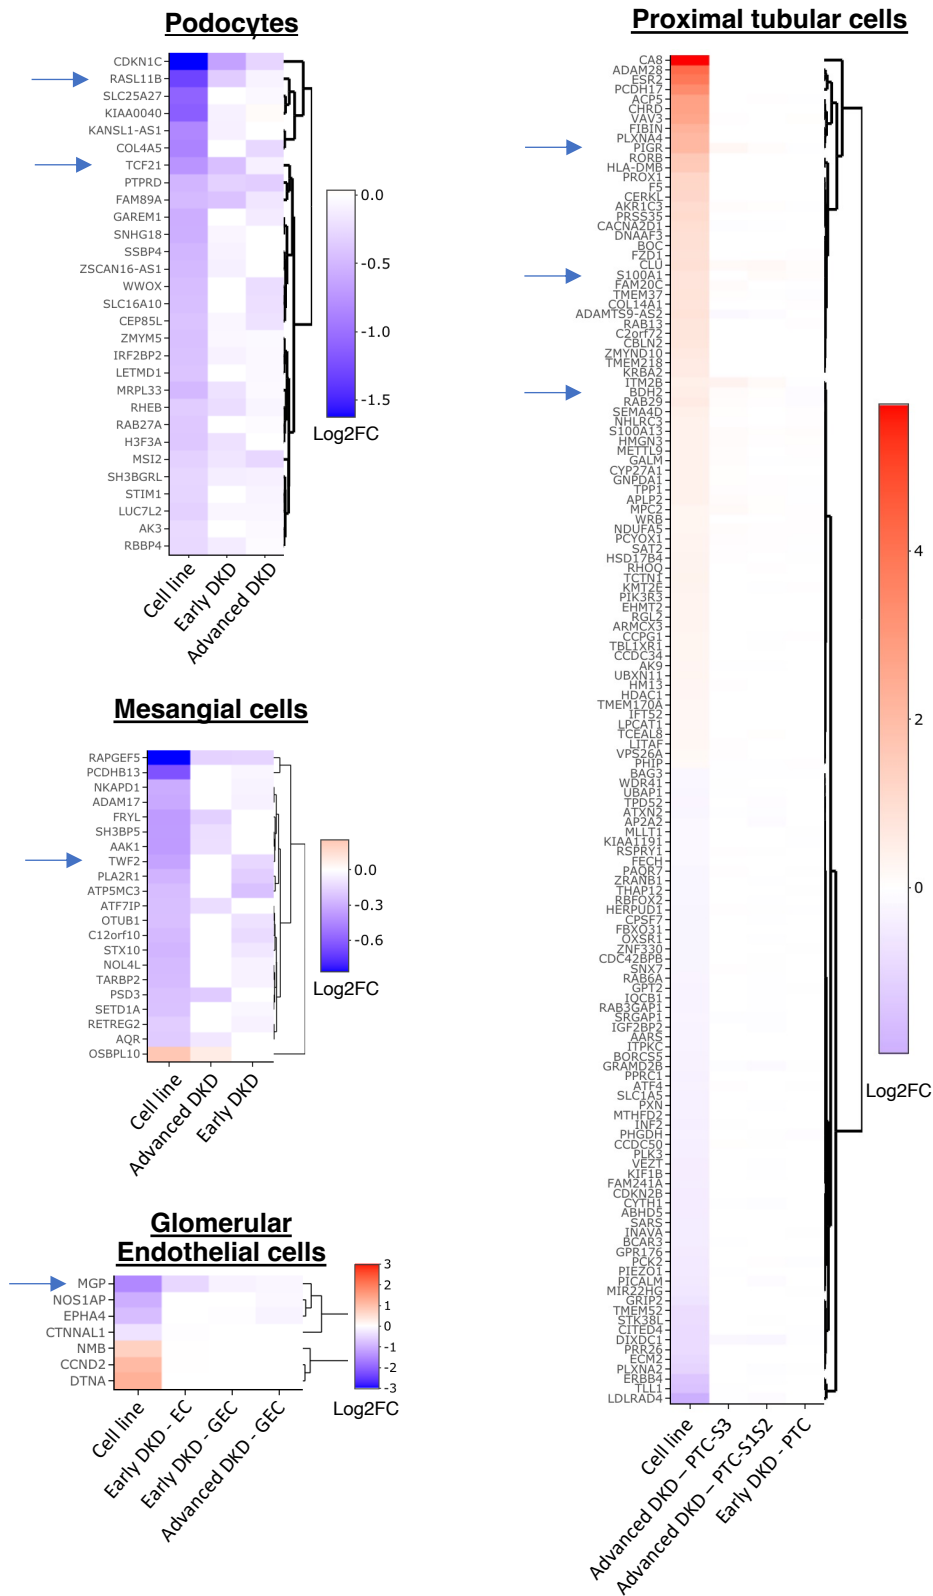

**Supplementary Fig. 15: Overlap between cell-type-specific responses to insulin resistance (*in vitro*) and human diabetic kidney disease**

Log<sub>2</sub> Fold Change values for genes found to be significantly regulated in insulin resistance, in a cell-type-specific manner *in vitro* that are also significantly regulated in equivalent cell types in human diabetic kidney disease, single-cell-RNA sequencing data (adjusted  $p < 0.05$ ). 'Early DKD' = an American Indian type-2 diabetes cohort with early-DKD ( $n=44$  early-DKD vs  $n=18$  LD); 'Advanced DKD' = data from the Kidney Precision Medicine Project ( $n=10$  advanced-DKD vs  $n=18$  living donor); 'EC' = Endothelial Cell; 'GEC' = Glomerular Endothelial Cell subcluster; 'PTC-S3' = Proximal Tubule Subcluster 3; 'PTC-S1S2' = Proximal Tubule Subcluster 1 / 2'

**a**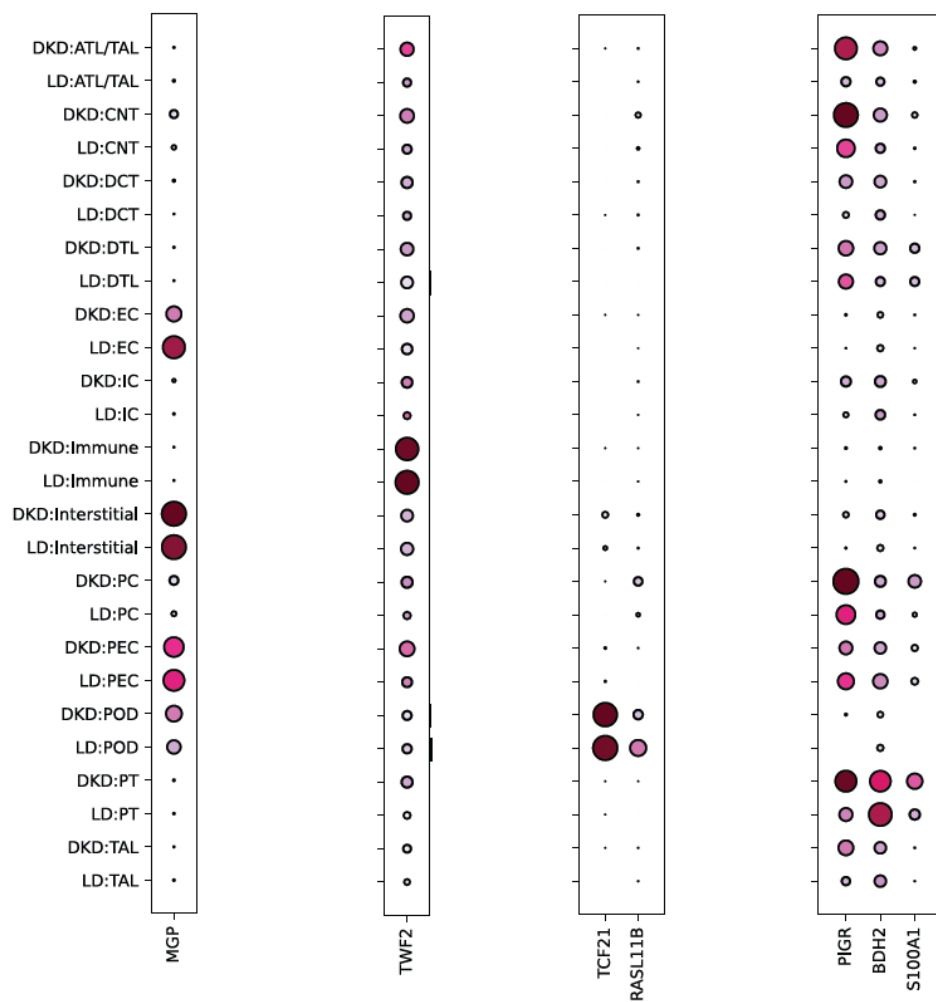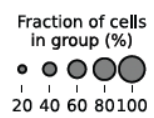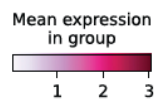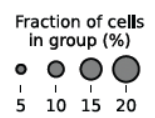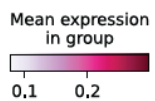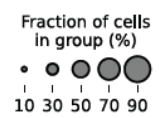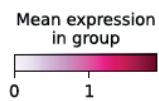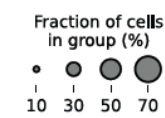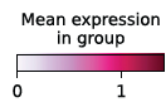**b**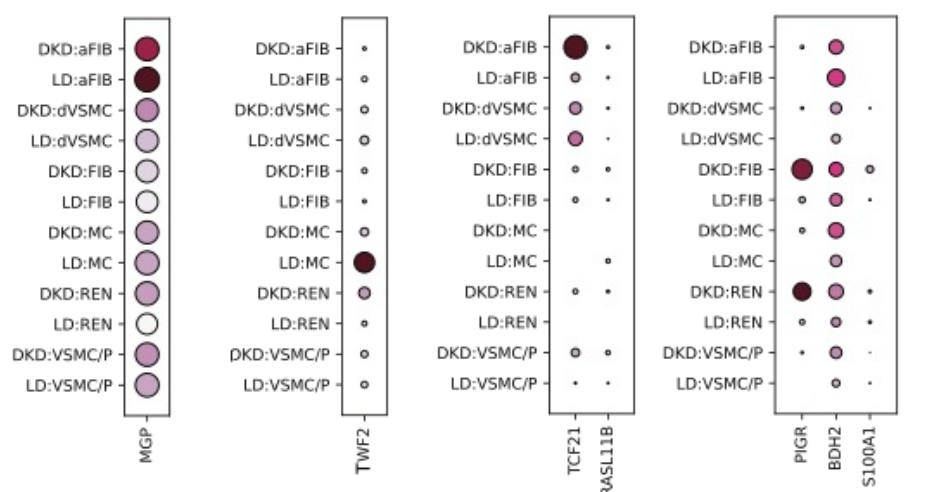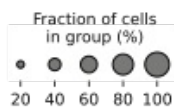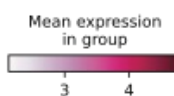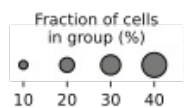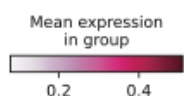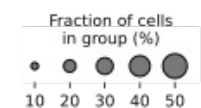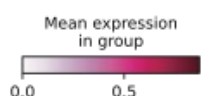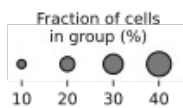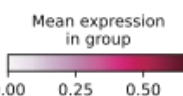

**Supplementary Fig. 16: Targeted analysis of kidney single cell sequencing data highlights replicated cell-type-specific responses to insulin resistance in human diabetic kidney disease**

**a** Single-cell sequencing analysis of target genes in each cell-type cluster (dot plots displaying the percentage of expressing cells and mean expression values) in advanced DKD from the Kidney Precision Medicine Project ( $n=10$  advanced-DKD vs  $n=18$  living donor) and **b** expression of those genes in 'interstitial cell' subclusters.



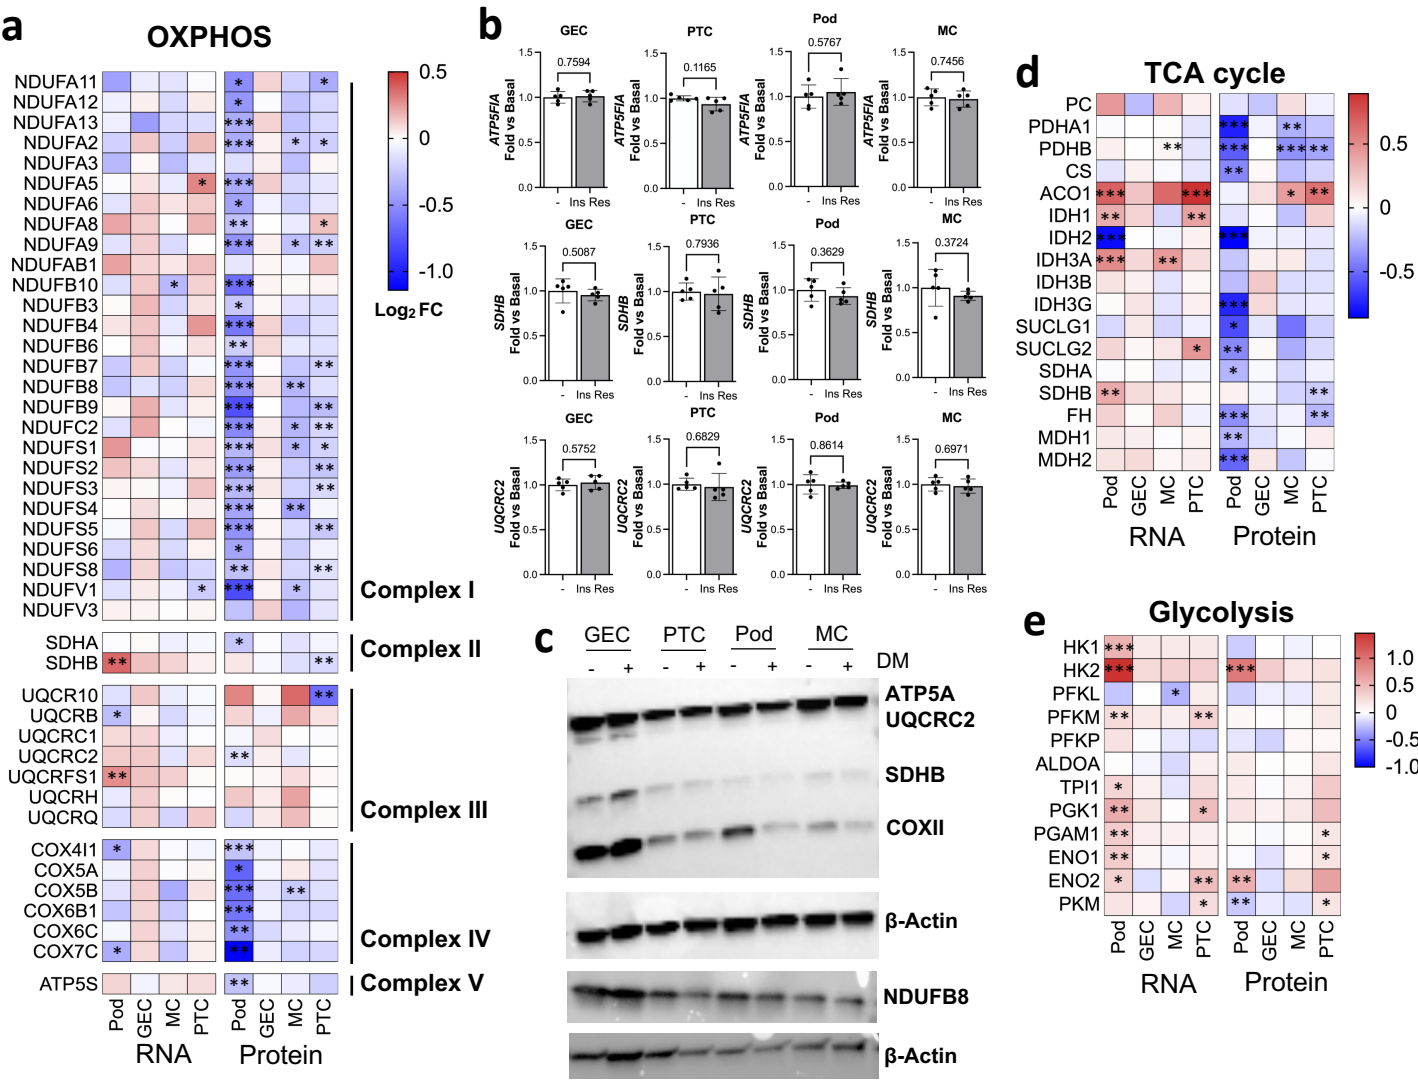

**Supplementary Fig. 17: Differential expression of OXPHOS, TCA cycle and glycolysis transcripts and proteins in insulin resistant vs insulin sensitive cell lines**

Log<sub>2</sub> Fold Change values in insulin resistant vs control conditions for **a** respiratory chain (OXPHOS) complex transcripts and proteins detected in all cell types \*p<0.05, \*\*p<0.01, \*\*\*p<0.001, unadjusted **b** qPCR results to show expression of mitochondrial OXPHOS subunits at the mRNA level (n=5) and **c** Western blotting demonstrating expression of equivalent OXPHOS protein subunits in 'basal' vs 'insulin resistant' conditionally immortalised human glomerular endothelial cells (GECs), proximal tubular cells (PTCs), podocytes (Pods) and mesangial cells (MCs) (n=5), two-tailed *t*-test **d** TCA cycle components detected at both the transcript and protein level in all cell types, **e** glycolysis enzymes detected at both the transcript and protein level in all cell types \*p<0.05, \*\*p<0.01, \*\*\*p<0.001, unadjusted

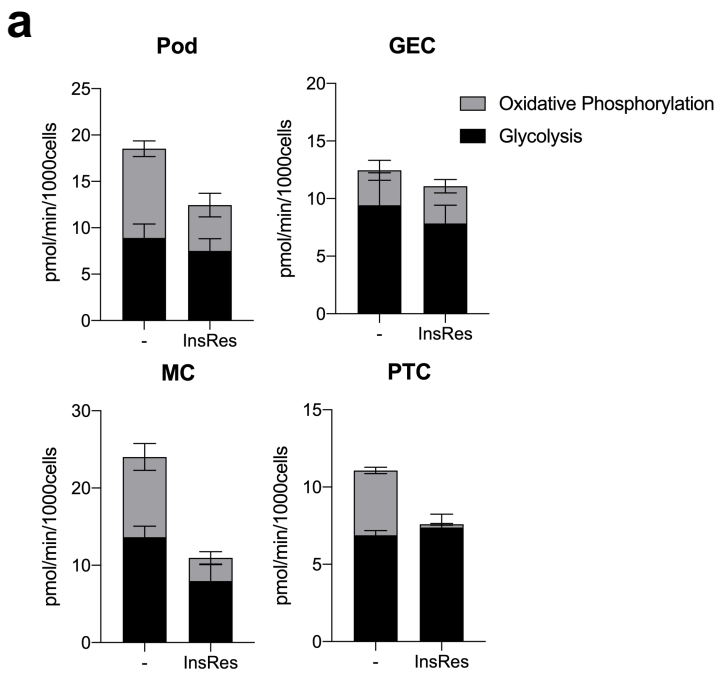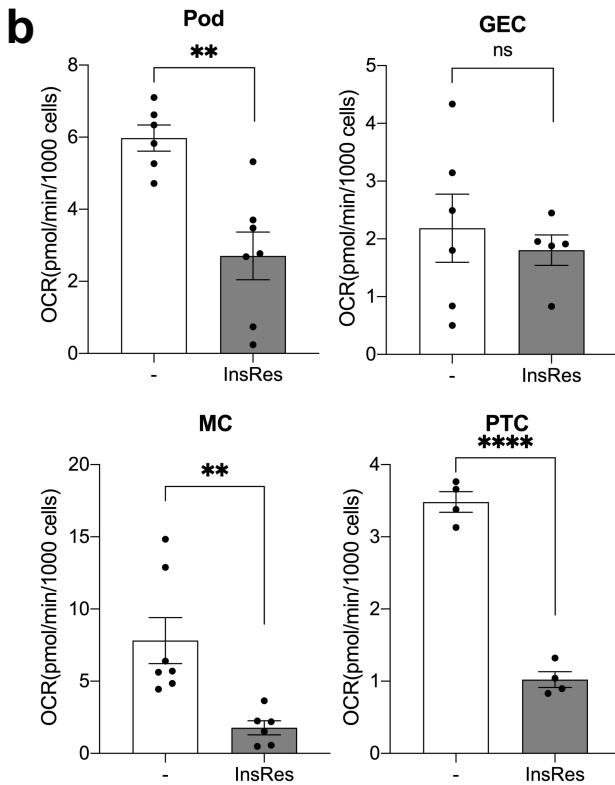

**Supplementary Fig. 18: Mitochondrial metabolism is differentially impaired in insulin-resistant kidney cells**

**a** ATP production attributed to glycolysis or oxidative phosphorylation in each cell line under basal or insulin resistant conditions, **b** OCR values per minute, per 1000 cells representing maximal respiration in 'Insulin Resistant' vs 'Basal' conditions in Podocytes ('Pod',  $n=6$ ), Glomerular Endothelial Cells ('GEC',  $n=5$  or  $6$ ), Mesangial Cells ('MC',  $n=6$ ) and Proximal Tubular Cells (PTC,  $n=4$ )  $**p<0.01$ ,  $***p<0.001$ ,  $****p<0.0001$ , two-tailed  $t$ -test.

**Uncropped Western blots for  
Supplementary material**

# Uncropped gels for Supplementary Figure 1

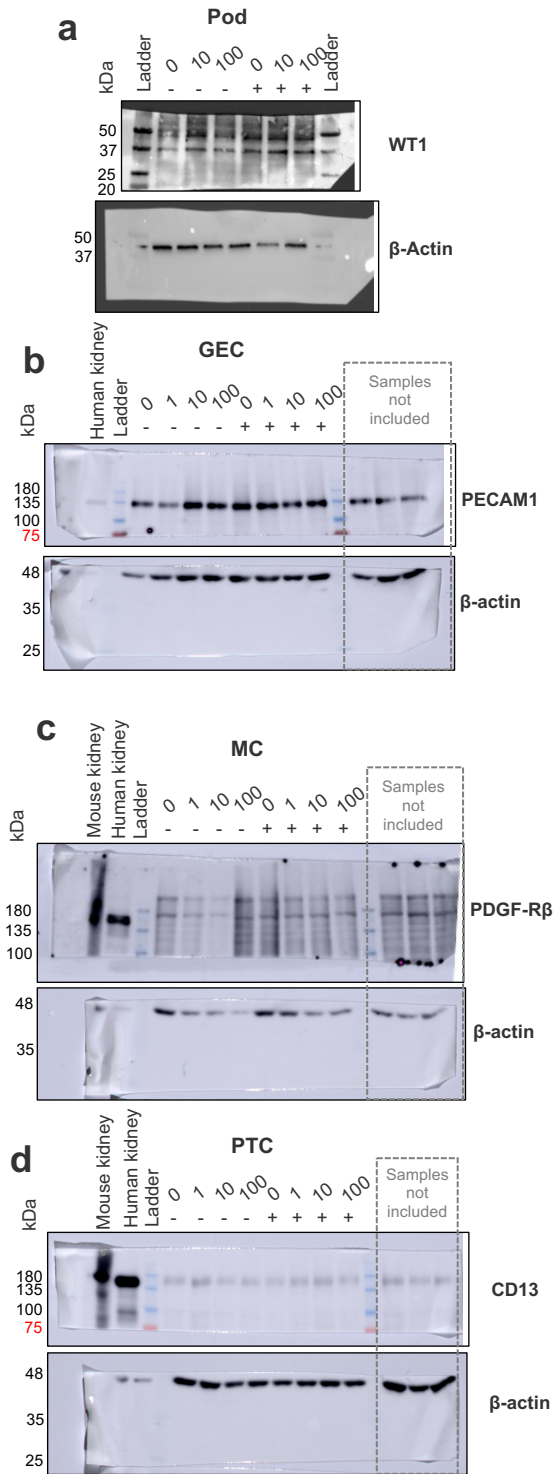

# Uncropped gels for Supplementary Figure 17

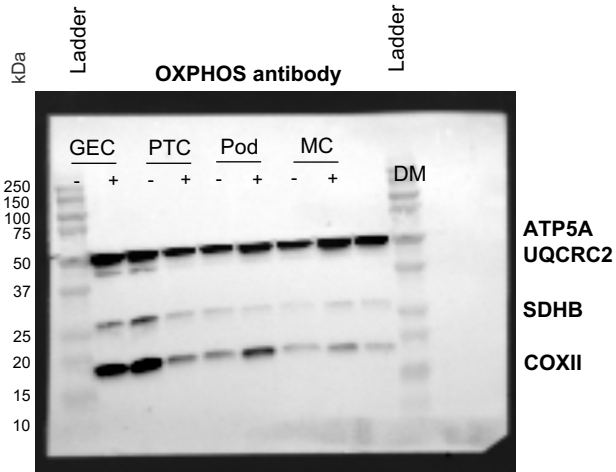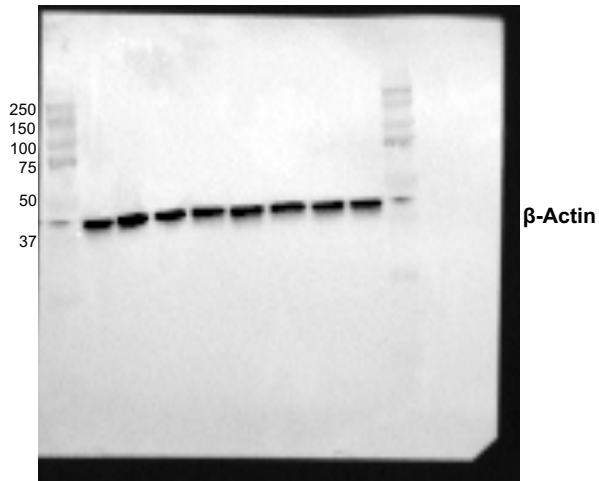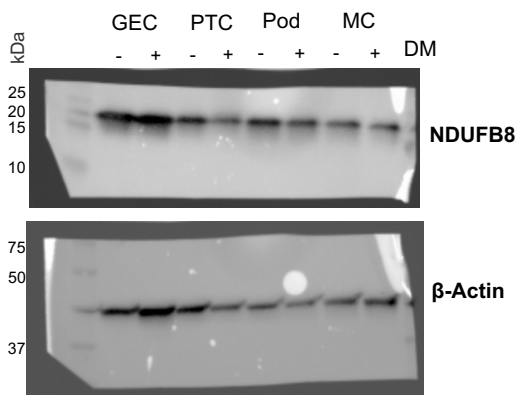

Supplement: 41467_2024_54089_MOESM1_ESM.pdf [file 41467_2024_54089_MOESM1_ESM.pdf]
