# Supplementary material for: Profiling of insulin-resistant kidney models and human biopsies reveals common and cell-type-specific mechanisms underpinning Diabetic Kidney Disease
Source: PubMed Central journal article supplement (PMC11576882; doi:10.1038/s41467-024-54089-1), 2024-11-19
Supplement: 41467_2024_54089_MOESM2_ESM.pdf [file 41467_2024_54089_MOESM2_ESM.pdf]

## **Description of Additional Supplementary Files**

### **Supplementary Data 1: Top 40 consistent genes and their functions**

Combined results of DE (Log2 FC) and consensus-OPLS predicted values were used to select the 'Top 40' consistently regulated proteins and transcripts across all cell lines. Functional annotations were downloaded from the Uniprot and/or EBI database and edited manually.

### **Supplementary Data 2: Transcription Factor binding site enrichment for the top 40 consistently regulated genes**

Results of Overrepresentation analysis (one tailed) using the TRANSFAC database demonstrating transcription factor binding sites significantly enriched amongst top 40 genes, consistently regulated across all insulin resistant cell types.

### **Supplementary Data 3: Baseline characteristics of human cohorts**

Baseline characteristics of human Diabetic Kidney Disease cohorts, age, diabetes duration, HbA1C, GFR, ACR and Proteinuria presented as mean (SD)

### **Supplementary Data 4: Immune GSEA results**

Normalised enrichment scores (NES) for immune/ inflammatory response pathways significantly enriched across insulin resistant cell lines and the core enrichment inflammatory genes and proteins.

### **Supplementary Data 5: ER stress GSEA results**

Normalised enrichment scores (NES) for ER stress/UPR pathways significantly enriched across insulin resistant cell lines and the core enrichment ER stress/UPR genes and proteins.

### **Supplementary Data 6: Glycoprotein metabolism GSEA results**

Normalised enrichment scores (NES) for pathways related to glycoprotein metabolism and the core enrichment genes and proteins, that were found to be significantly enriched across insulin resistant cell lines.

**Supplementary Data 7: CORE mitochondrial genes driving enrichment**

Core genes and proteins driving the enrichment of mitochondrial pathways were selected from GSEA results. Functional annotations were downloaded from the Uniprot database and edited manually.

**Supplementary Data 8: KPMP IDs**

Participant ID numbers for Diabetic Kidney Disease patients from the Kidney Precision medicine project that were used in this study.
